# Supplementary material for: Comparative Transcriptome Analysis Reveals the Gene Expression and Regulatory Characteristics of Broad-Spectrum Immunity to Leaf Rust in a Wheat–Agropyron cristatum 2P Addition Line
Source: MDPI journal article supplement (doi:10.3390/ijms23137370), 2022-07-01
Supplement: s1 [file s1]

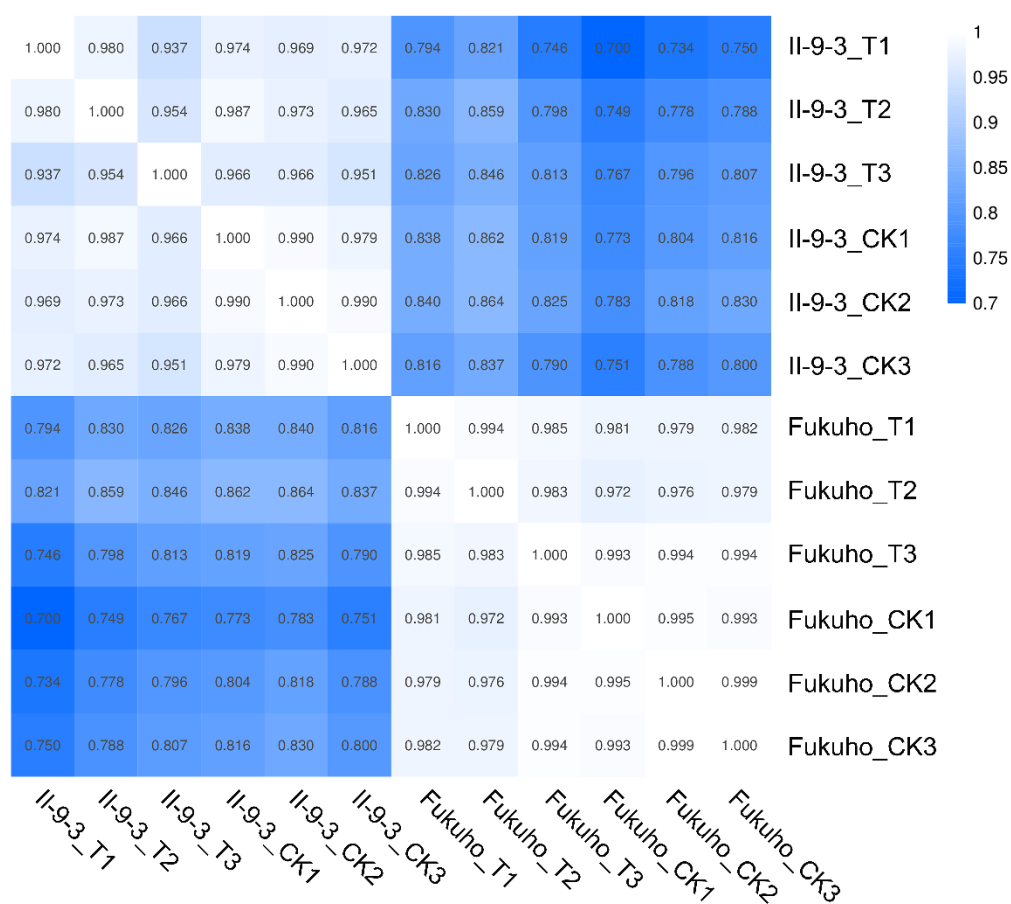

Figure S1. Correlation coefficients for each sample of addition line II-9-3 and recipient wheat Fukuho
