# Supplementary material for: Comparative Transcriptome Analysis Reveals the Gene Expression and Regulatory Characteristics of Broad-Spectrum Immunity to Leaf Rust in a Wheat–Agropyron cristatum 2P Addition Line
Source: MDPI journal article supplement (doi:10.3390/ijms23137370), 2022-07-01
Supplement: s1 [file s1]

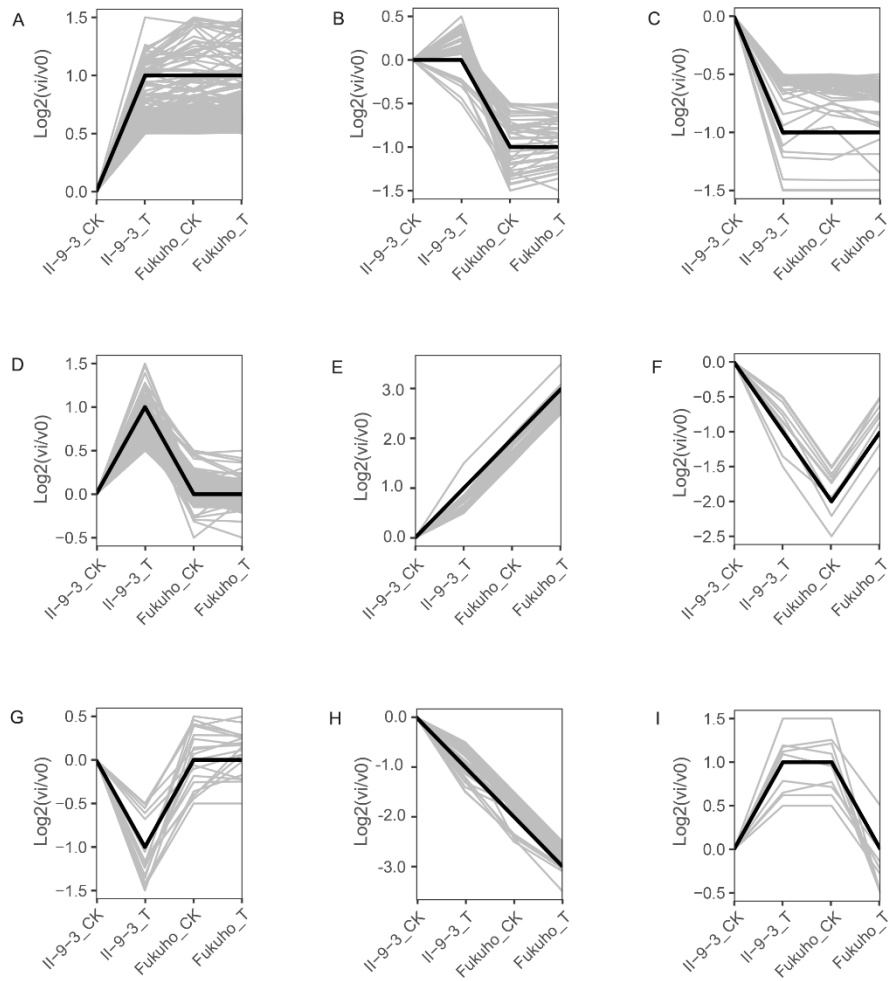

Figure S2. Clustering trend of DEGs of wheat in the addition line II-9-3 and Fukuho. The expression level of II-9-3\_CK was used as the control. A-I represent clusters of 9 different trends of relative expression levels of wheat DEGs of addition line II-9-3 among four groups.
